# Supplementary material for: Controlled synthesis of yolk–mesoporous shell Si@SiO2nanohybrid designed for high performance Li ion battery
Source: Royal Society of Chemistry journal article supplement (doi:10.1039/c4ra01871k), 2014-01-01
Supplement: c4ra01871k1.pdf [file c4ra01871k1.pdf]

**Supplementary Information**

*for*

Controlled synthesis of yolk-mesoporous shell Si@SiO<sub>2</sub>  
nanohybrid designed for high performance Li ion battery

*Zhuang Sun, Xuefeng Song\*, Peng Zhang, Lian Gao\**

*State Key Laboratory for Metallic Matrix Composite Materials,*

*School of Materials Science and Engineering,*

*Shanghai Jiao Tong University, Shanghai, 200240, China.*

\*E-mail address: liangao@mail.sic.ac.cn (L. Gao); songxfeng@sjtu.edu.cn (X. Song)

Tel: +86-12-52412718. Fax: +86-21-52413122

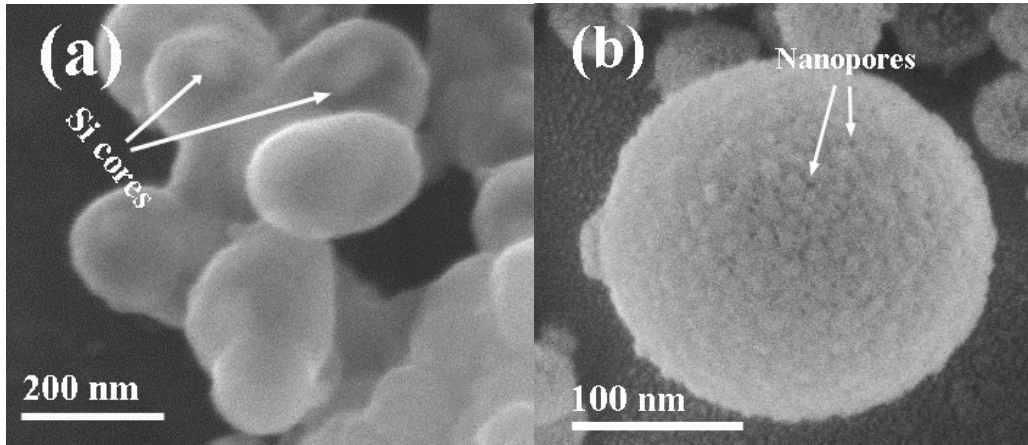

**Figure S1.** SEM images of YMSSN with different magnification.

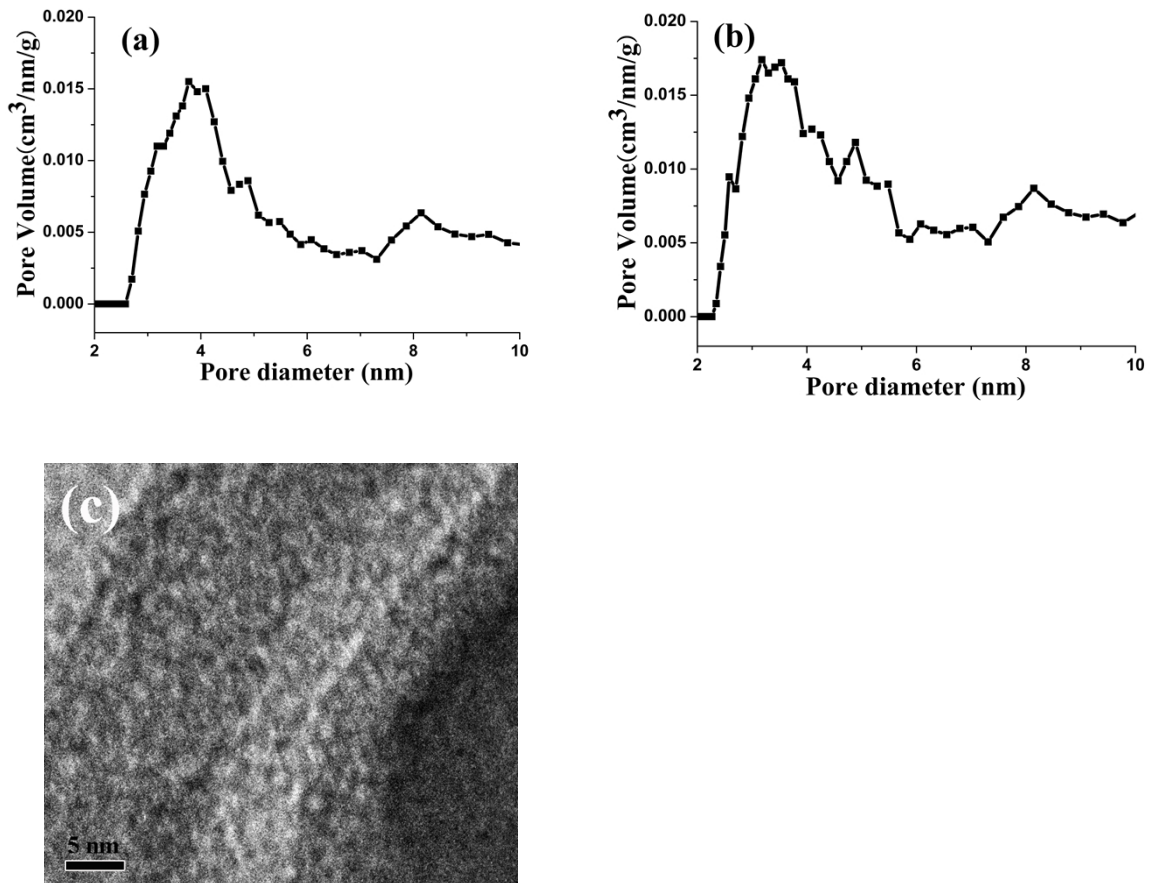

**Figure S2.** The pore size distributions of a) MHSS and b) YMSSN. c) The HRTEM image of a single YMSSN.

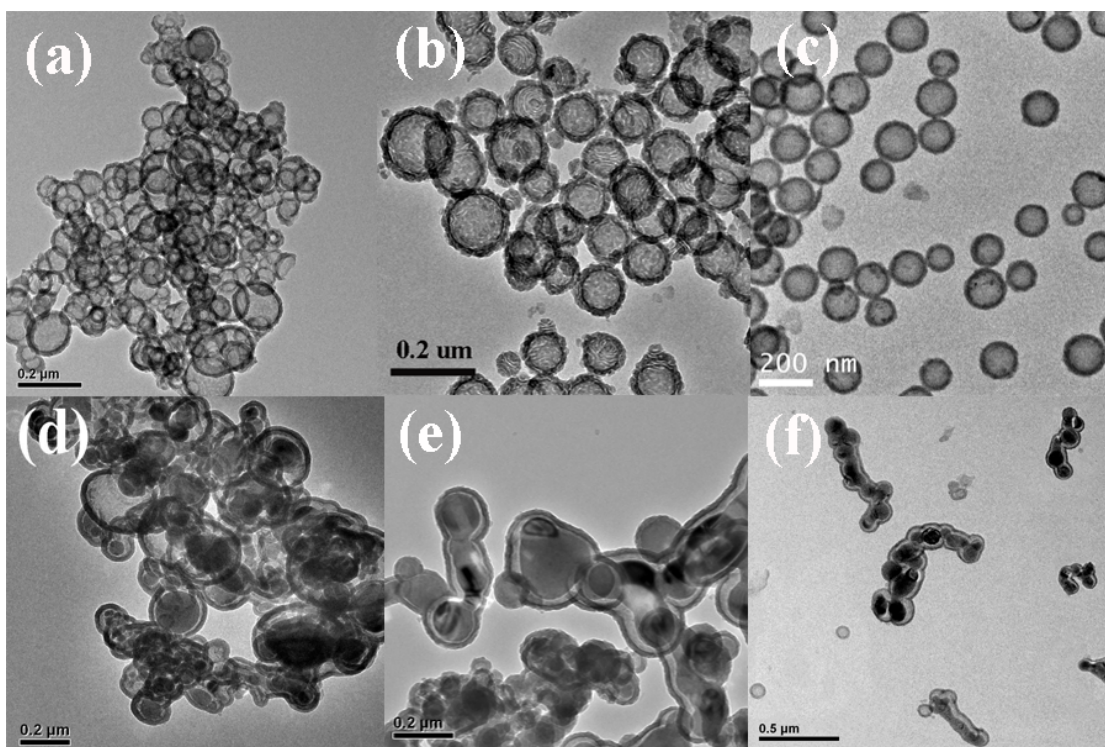

**Figure S3.** TEM images of the: (a-c) MHSS obtained at LSB/SDBS concentrations of  $1 \times 10^{-5}$  M,  $3 \times 10^{-5}$  M and  $5 \times 10^{-5}$  M, respectively; (d-f) YMSSN obtained at LSB/SDBS concentrations of  $1 \times 10^{-5}$  M,  $3 \times 10^{-5}$  M and  $5 \times 10^{-5}$  M, respectively.

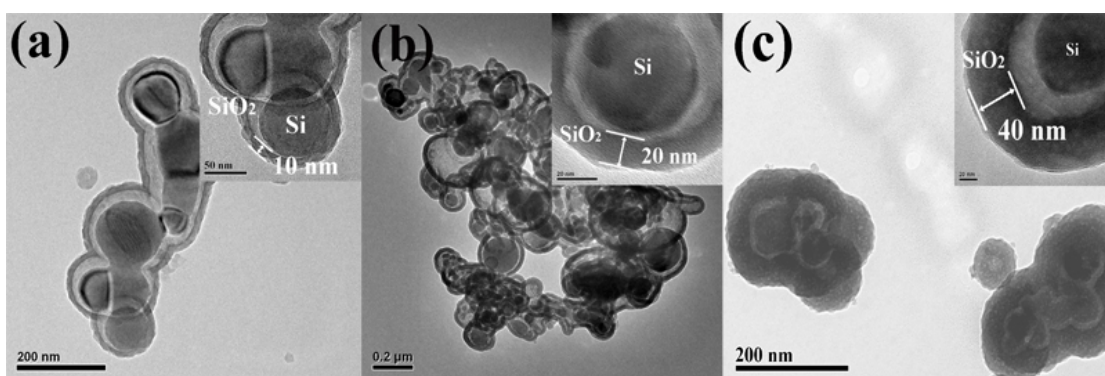

**Figure S4.** TEM images of the YMSSN obtained at: a-c) TEOS concentrations of  $4 \times 10^{-2}$  M,  $7 \times 10^{-2}$  M and  $1.4 \times 10^{-1}$  M, respectively.

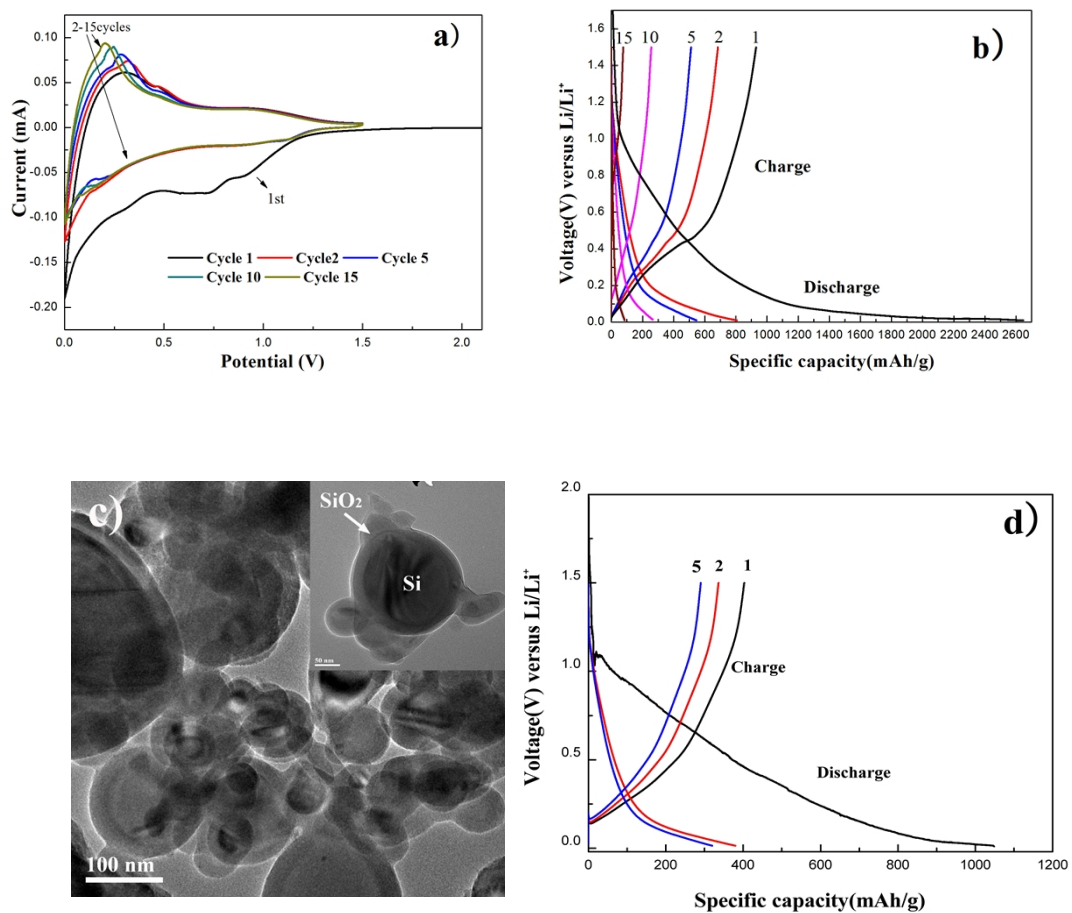

**Figure S5.** a) Cyclic voltammetry curve of the Si Nps showing the first fifteen cycles between 1.5 V and 0 V at a scan rate of 0.1 mV s<sup>-1</sup>; b) Galvanostatic charge/discharge curves of Si Nps electrode at a current density of 50 mA g<sup>-1</sup>. c) TEM images of the Si@silica composites with dense shell. d) Galvanostatic charge/discharge curves of Si@silica composites with dense shell electrode at a current density of 50 mA g<sup>-1</sup>.

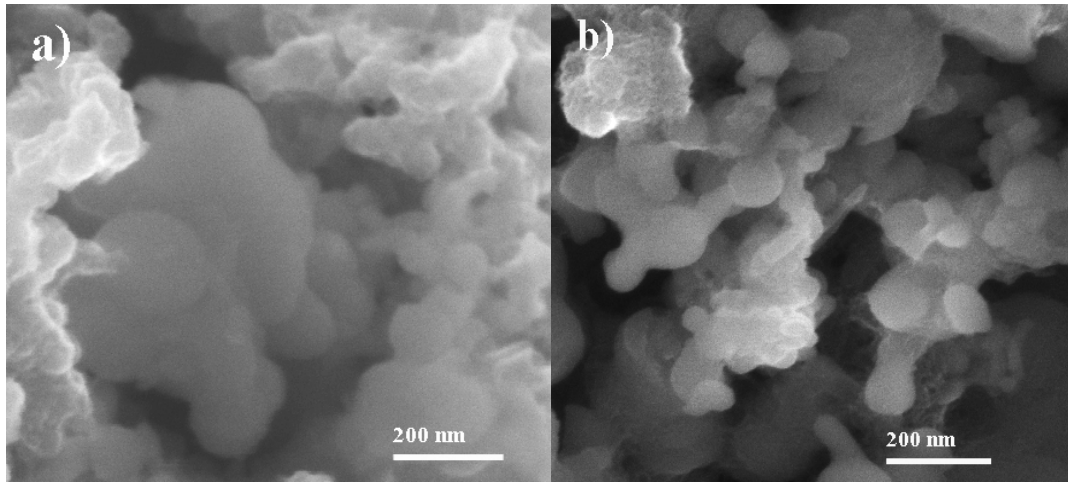

**Figure S6.** The SEM images of: a) bare Si Nps after 30 cycling and b) YMSSN after 30 cycling.
